# Supplementary material for: Dynamical and surface impacts of the January 2021 sudden stratospheric warming in novel Aeolus wind observations, MLS and ERA5
Source: Copernicus journal article supplement (doi:10.5194/wcd-2-1283-2021), 2021-12-20
Supplement: Supplementary file 1 [file wcd-2-1283-2021-supplement.zip]

Archive with 4 entries (4 files):
- wcd-2-1283-2021-supplement-title-page.pdf
- supplementary_S2.png
- supplementary_S3.png
- supplementary_S1.png
