# Supplementary material for: Dynamical and surface impacts of the January 2021 sudden stratospheric warming in novel Aeolus wind observations, MLS and ERA5
Source: Copernicus journal article supplement (doi:10.5194/wcd-2-1283-2021), 2021-12-20
Supplement: Supplementary file 1 [file wcd-2-1283-2021-supplement.zip › wcd-2-1283-2021-supplement-title-page.pdf]

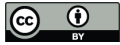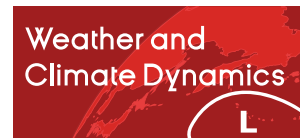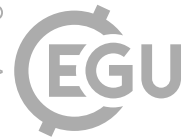

*Supplement of*

## **Dynamical and surface impacts of the January 2021 sudden stratospheric warming in novel Aeolus wind observations, MLS and ERA5**

**Corwin J. Wright et al.**

*Correspondence to:* Corwin Wright (c.wright@bath.ac.uk)

- wcd-2-1283-2021-supplement-title-page.pdf
- supplementary\_S1.png
- supplementary\_S2.png
- supplementary\_S3.png

The copyright of individual parts of the supplement might differ from the article licence.
