# Supplementary figures and images for: Dynamical and surface impacts of the January 2021 sudden stratospheric warming in novel Aeolus wind observations, MLS and ERA5
Source: Copernicus journal article supplement (doi:10.5194/wcd-2-1283-2021), 2021-12-20

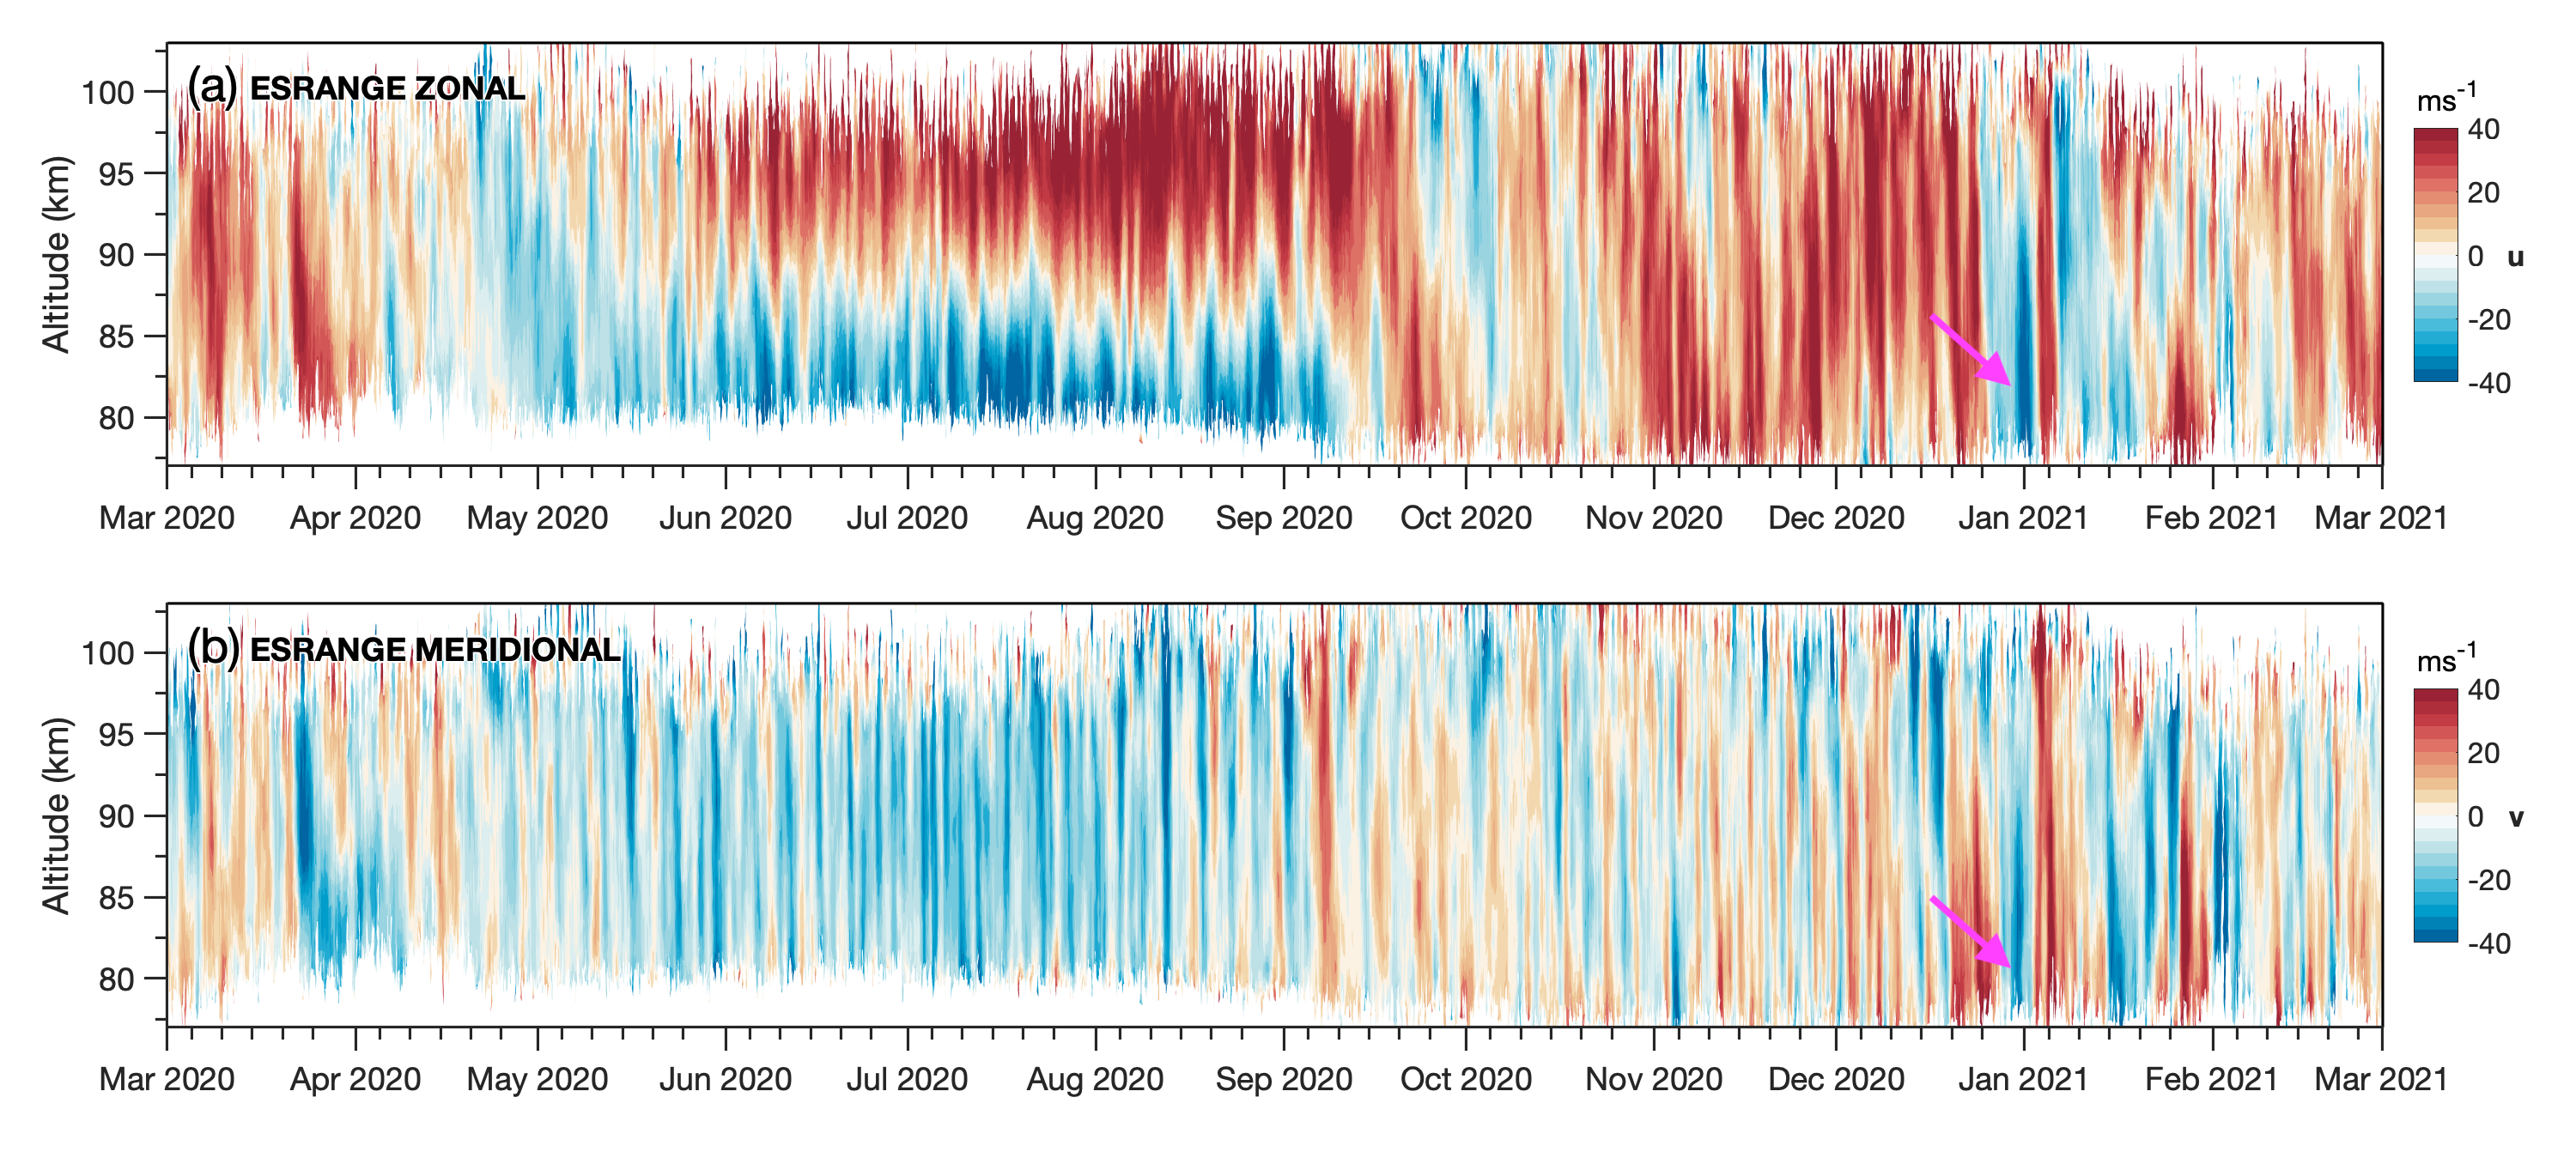

Supplement: Supplementary file 1 [file wcd-2-1283-2021-supplement.zip › supplementary_S2.png]

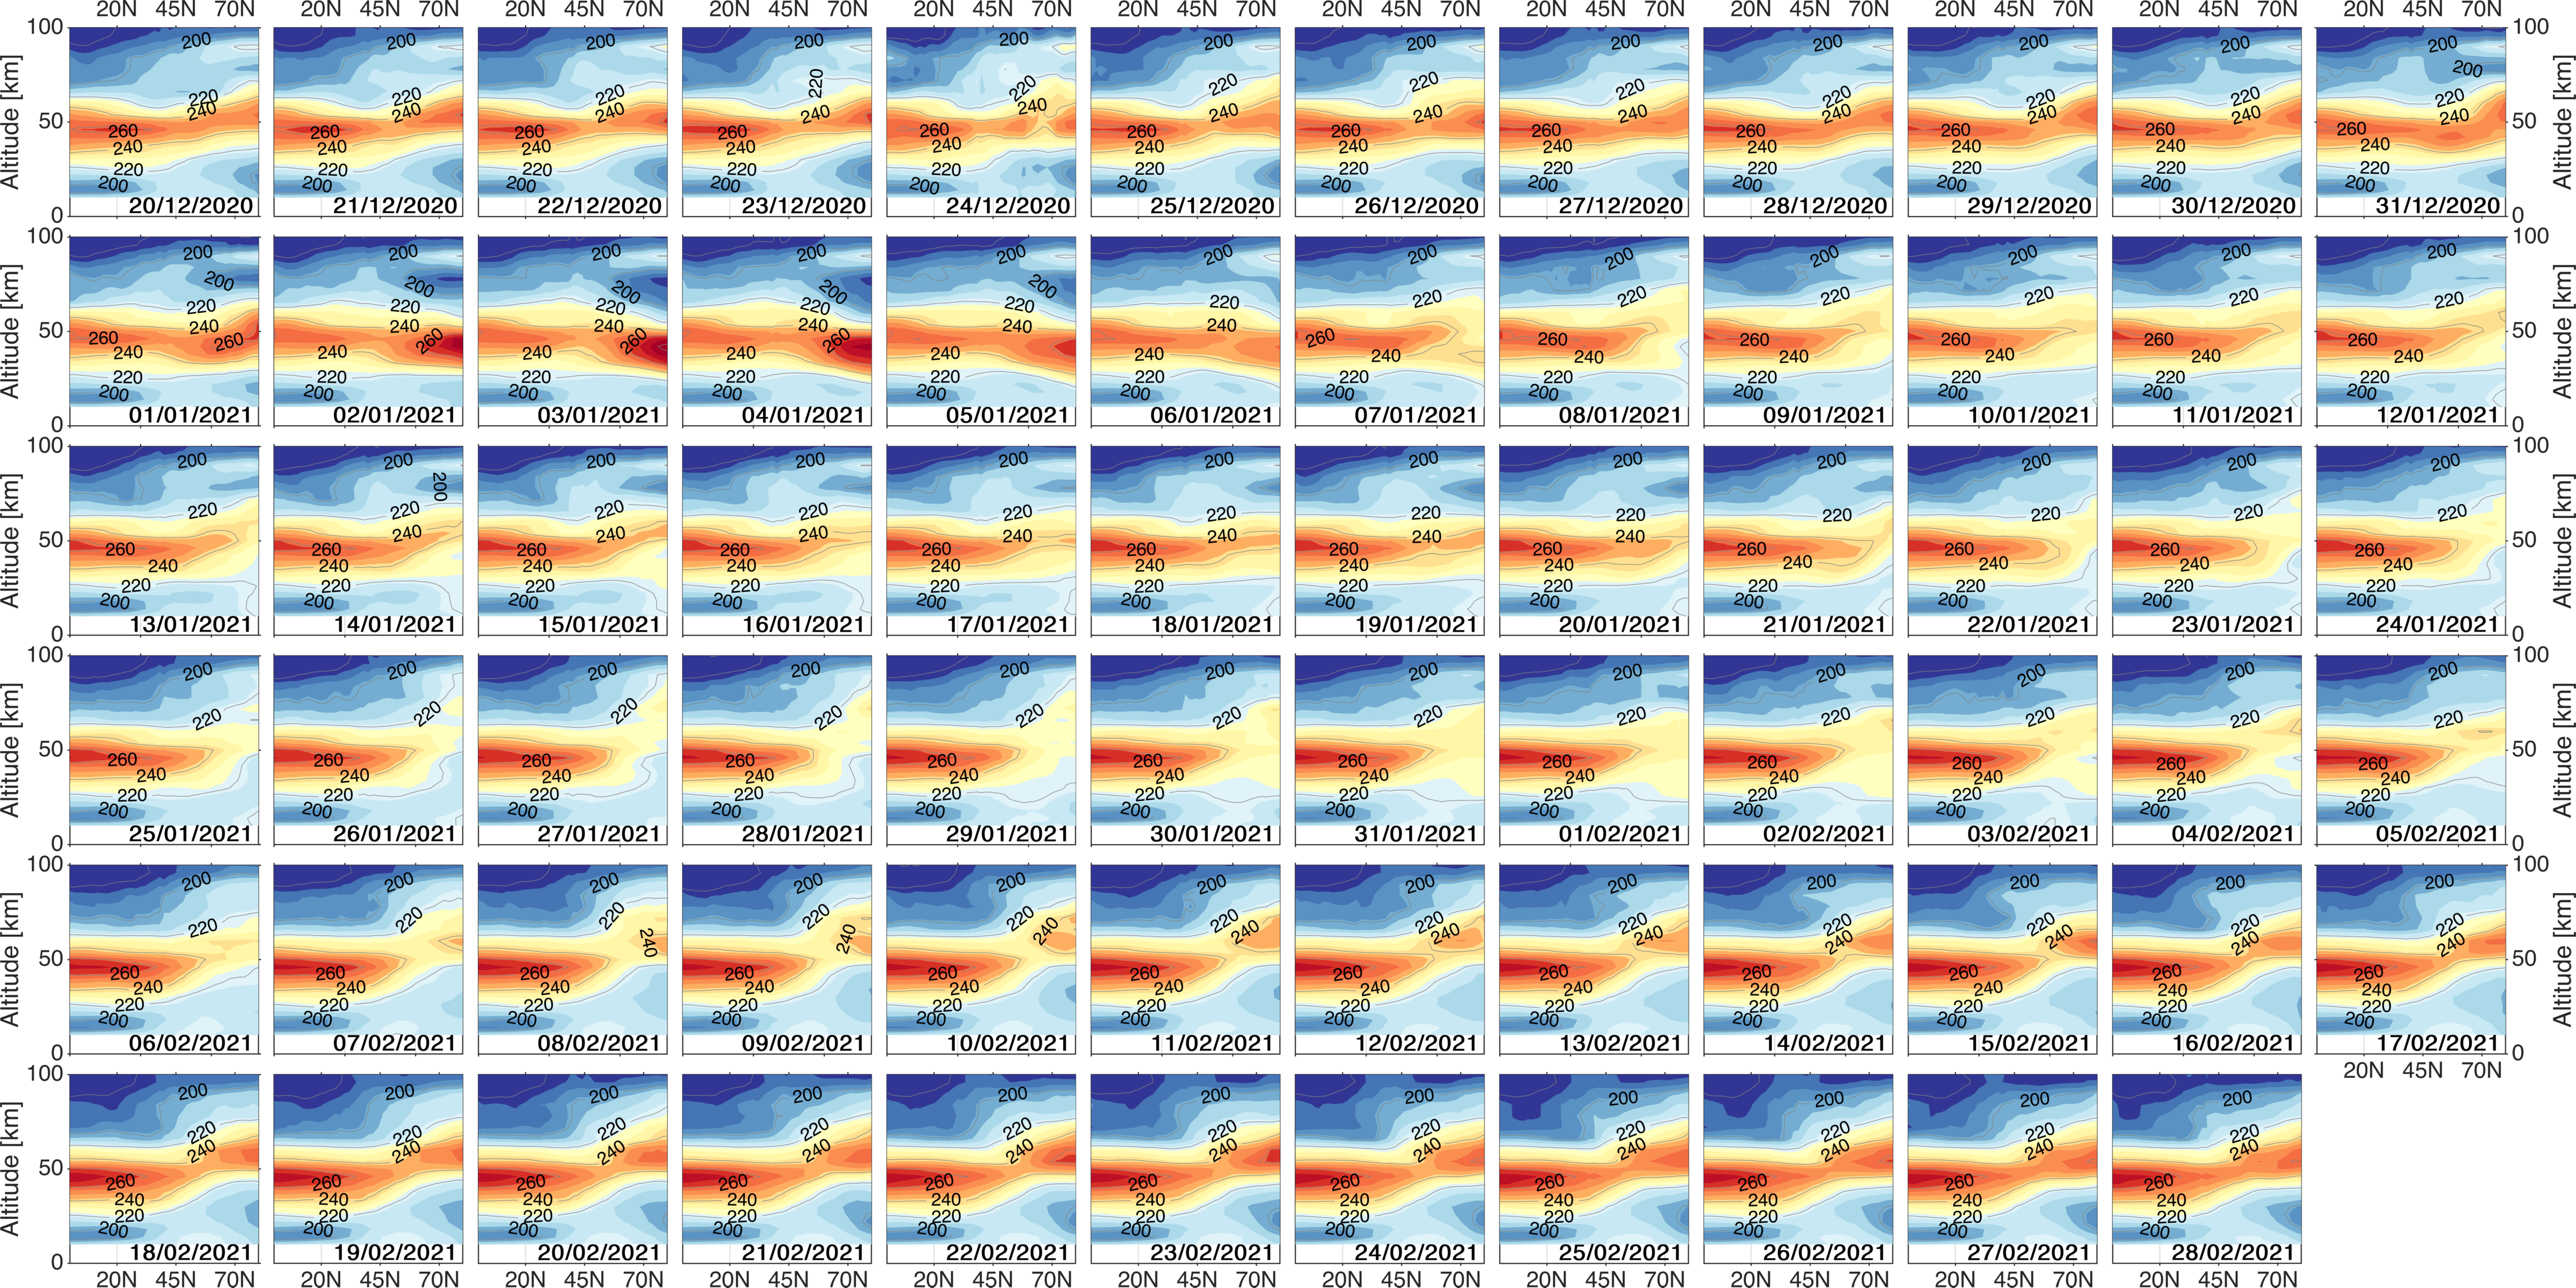

Supplement: Supplementary file 1 [file wcd-2-1283-2021-supplement.zip › supplementary_S3.png]

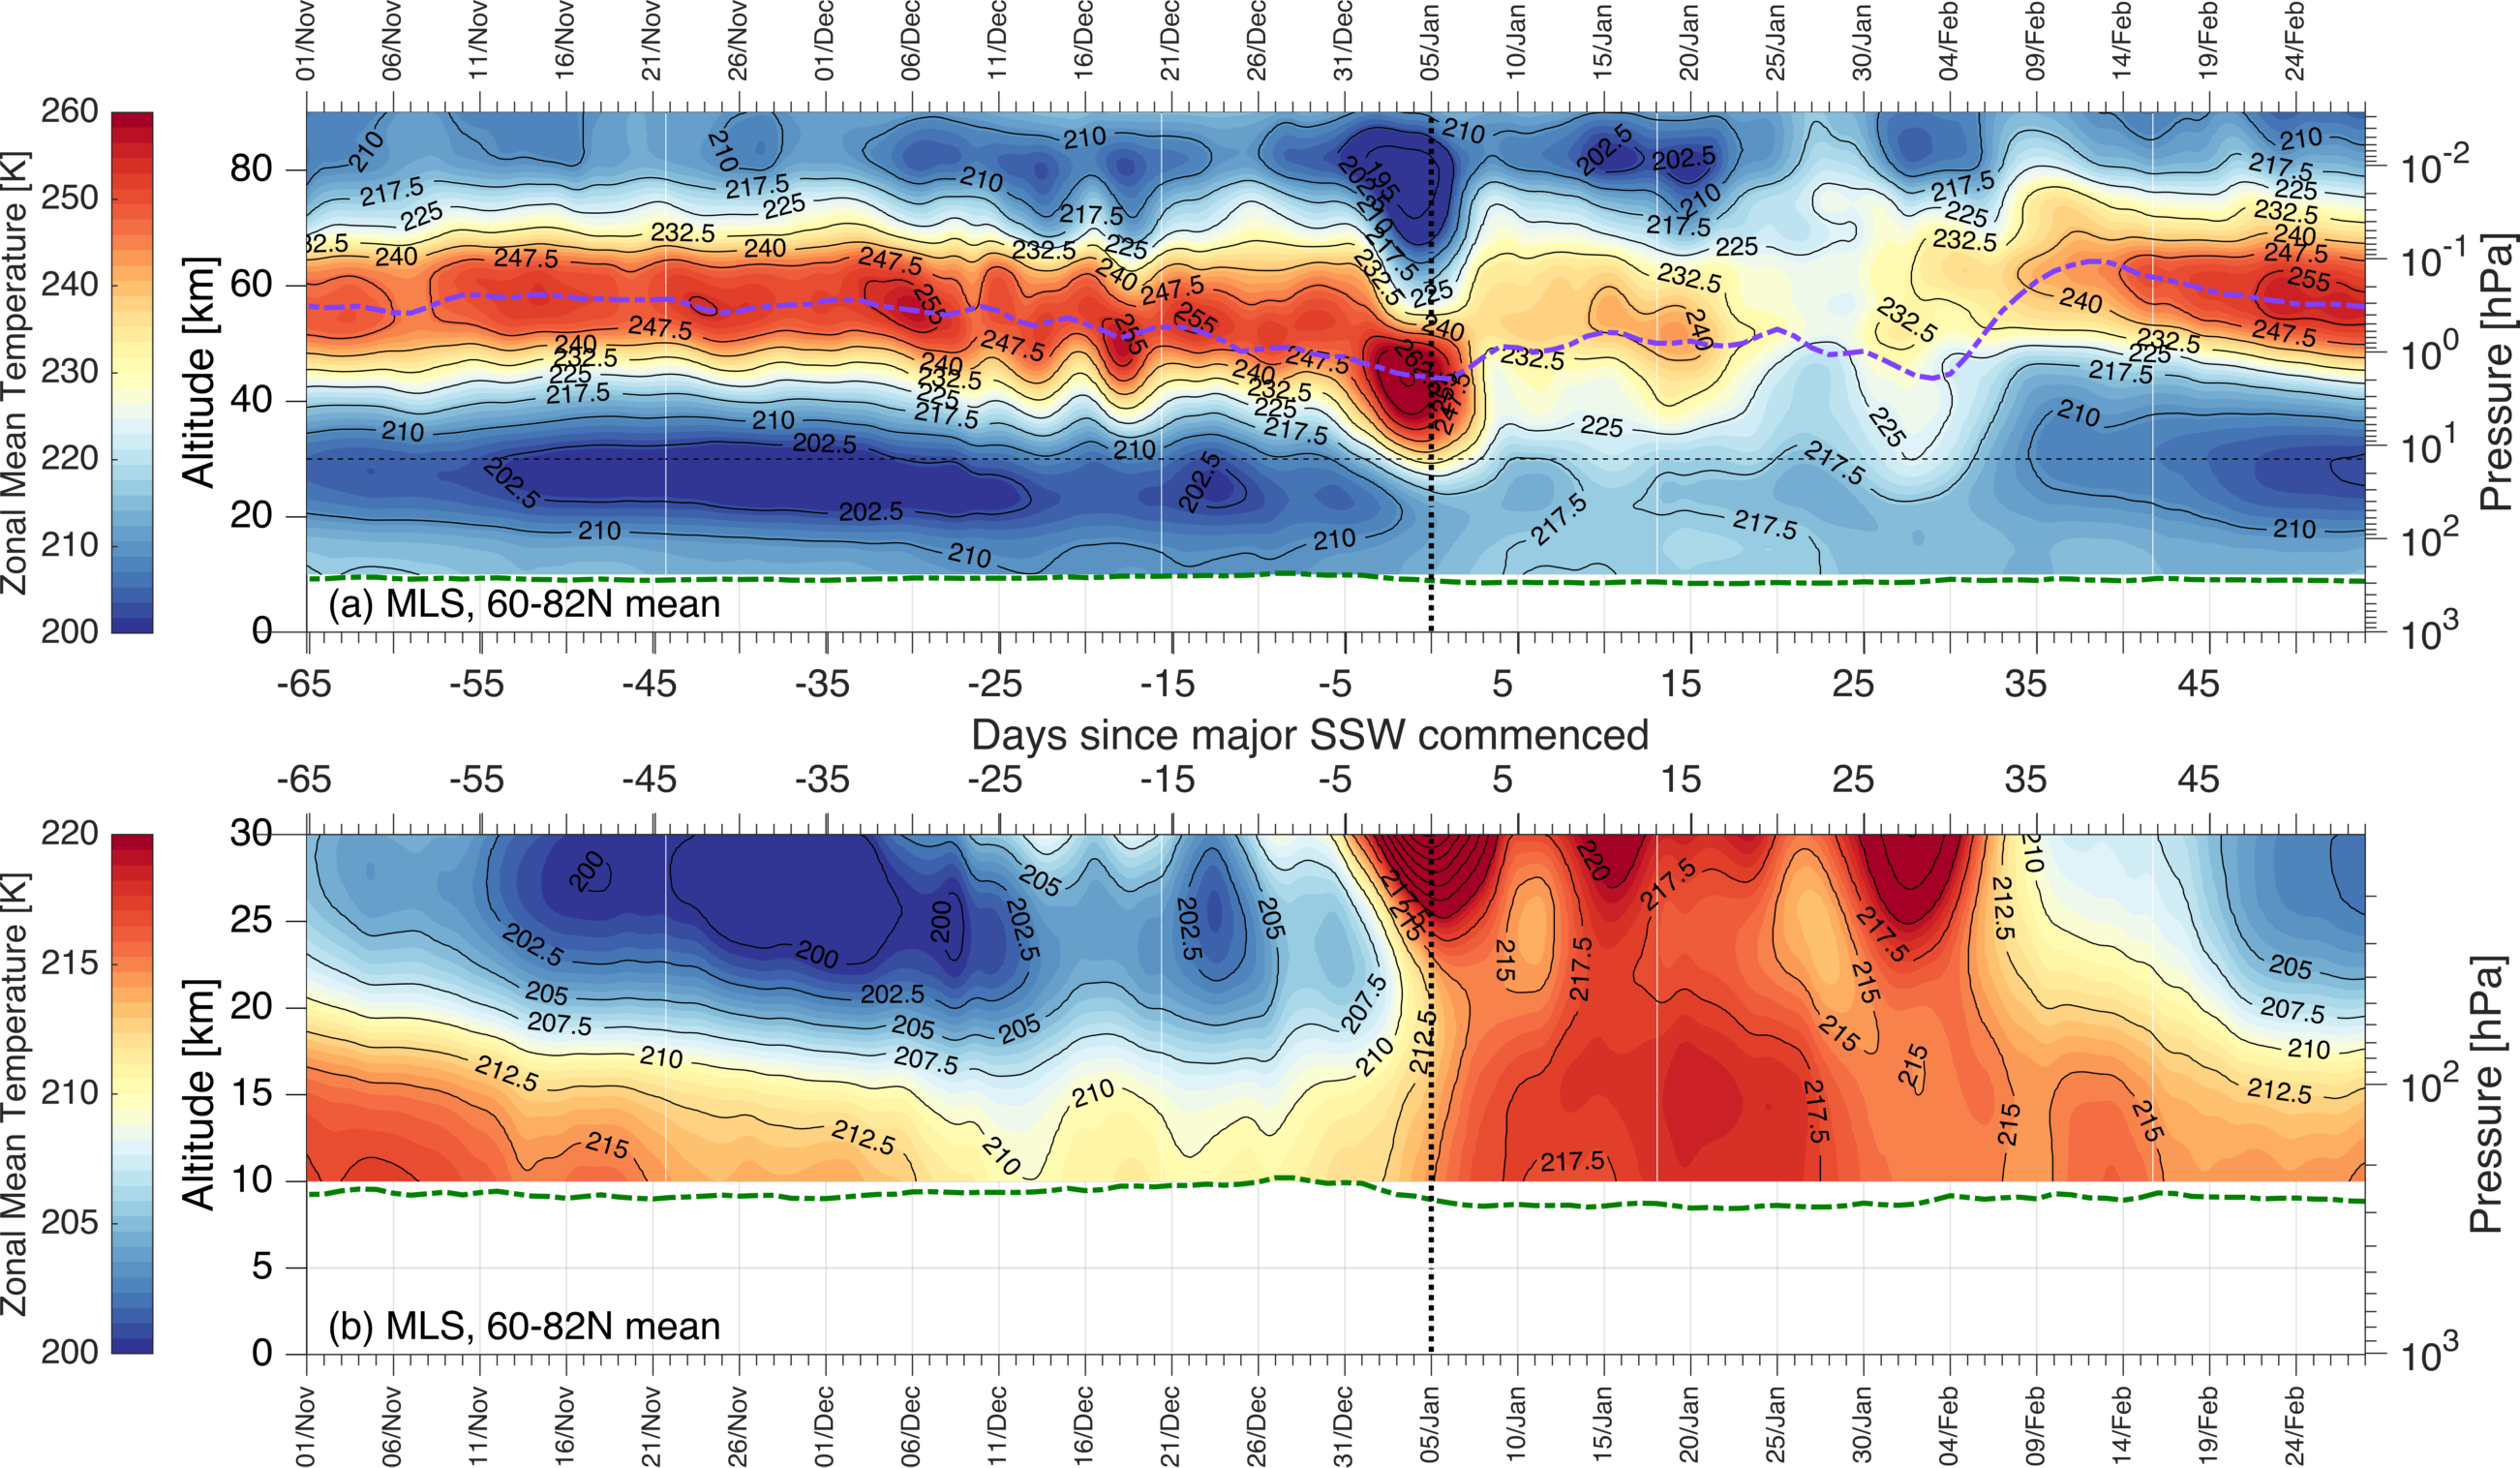

Supplement: Supplementary file 1 [file wcd-2-1283-2021-supplement.zip › supplementary_S1.png]
